1 **Title: Variation in relaxation of non-photochemical quenching in a soybean nested**  
2 **association mapping panel as a potential source for breeding improved photosynthesis**

3  
4 Steven J. Burgess (0000-0003-2353-7794)<sup>1\*</sup>, Elsa de Becker (0000-0002-7928-2586)<sup>1,2</sup>,  
5 Stephanie Cullum (0000-0002-2987-0347)<sup>1</sup>, Isla Causon (0000-0003-4661-9063)<sup>1</sup>, Iulia  
6 Floristeanu (0000-0002-1455-4608)<sup>1</sup>, Kher Xing Chan (0000-0002-0236-6378)<sup>1</sup>, Caitlin E.  
7 Moore (0000-0003-0993-4419)<sup>3,4</sup>, Brian W. Diers (0000-0003-3584-5495)<sup>5</sup>, Stephen P. Long  
8 (0000-0002-8501-7164)<sup>1,6</sup>

9  
10 <sup>1</sup> Carl R Woese Institute for Genomic Biology, University of Illinois at Urbana-Champaign,  
11 Urbana, IL, 61801, USA

12 <sup>2</sup> Department of Plant Biology, University of Illinois at Urbana-Champaign, Urbana, IL 61801,  
13 USA.

14 <sup>3</sup> Institute for Sustainability, Energy and Environment, University of Illinois at Urbana-  
15 Champaign, Urbana, IL, 61801, USA

16 <sup>4</sup> School of Agriculture and Environment, University of Western Australia, Crawley, WA, 6009,  
17 Australia

18 <sup>5</sup> Department of Crop Sciences, University of Illinois, Urbana, IL, 61801

19 <sup>6</sup> Lancaster Environment Centre, Lancaster University, Lancaster, LA1 4YQ, UK

20 \*e-mail address of corresponding author: [sjb287@illinois.edu](mailto:sjb287@illinois.edu)

21

22 **Keywords**

23 Non-photochemical quenching, photosynthesis, soybean, breeding

24 **Abstract**

25 Improving the efficiency of crop photosynthesis has the potential to increase yields. Genetic  
26 manipulation showed photosynthesis can be improved in Tobacco by speeding up relaxation of  
27 photoprotective mechanisms, known as non-photochemical quenching (NPQ), during high to low  
28 light transitions. However, it is unclear if natural variation in NPQ relaxation can be exploited in  
29 crop breeding programs. To address this issue, we measured NPQ relaxation in the 41 parents of  
30 a soybean NAM population in field experiments in Illinois during 2018 and 2019. There was  
31 significant variation in amount and rate of fast, energy dependent quenching (qE) between  
32 genotypes. However, strong environmental effects led to a lack of correlation between values  
33 measured over the two growing season, and low broad-sense heritability estimates ( $< 0.3$ ). These  
34 data suggest that either improvements in screening techniques, or transgenic manipulation, will be  
35 required to unlock the potential for improving the efficiency of NPQ relaxation in soybean.

## 36 Table of Abbreviations

---

| <b>Symbol</b> | <b>Description</b>                                                 |
|---------------|--------------------------------------------------------------------|
| $F_v/F_m$     | Maximum potential quantum efficiency of Photosystem II             |
| qE            | Fast phase of NPQ relaxation, energy-dependent quenching (< 2 min) |
| qM            | Intermediate phase of NPQ relaxation (2-30 min)                    |
| qI            | Slow phase of NPQ relaxation (> 30 min)                            |
| AqE           | Amplitude of qE                                                    |
| AqM           | Amplitude of qM                                                    |
| AqI           | Amplitude of qI                                                    |
| $\tau_{qE}$   | Half-life of qE relaxation                                         |
| $\tau_{qM}$   | Half-life of qM relaxation                                         |
| Max. NPQ      | Maximum recorded value of NPQ                                      |
| $J_{max}$     | Maximum rate of electron transport                                 |

---

37

## 38 Introduction

39 Soybean is a major source of vegetable protein worldwide. Improved agronomic practices and  
40 intensive breeding efforts led to sustained yield increases of 23.3 kg ha<sup>-1</sup> y<sup>-1</sup> between 1924 and  
41 2012 in the USA (Specht et al., 2014). However, further genetic improvements are required to  
42 meet future demands without expanding the area of land under cultivation and causing  
43 environmental degradation (Grassini et al., 2013).

44

45 The maximum achievable yield in the absence of abiotic or biotic stress is known as the yield  
46 potential, and can be defined as:

47

$$48 Y_p = 0.487 St \times \epsilon_i \times \epsilon_c \times \epsilon_p$$

49

50 Where  $St$  is the total solar incident radiation, 48.7 % of which is photosynthetically active (PAR);  
51 canopy light interception ( $\epsilon_i$ ) is the amount of solar radiation captured over a growing season; solar  
52 conversion efficiency ( $\epsilon_c$ ) is the ability to convert captured solar energy into seed biomass; and  
53 harvest index ( $\epsilon_p$ ) is the proportion of above-ground biomass that is partitioned into seed (Zhu et  
54 al., 2010).

55

56 Research suggests  $\epsilon_p$  (Morrison et al., 1999; Koester et al., 2016) and  $\epsilon_i$  (Dermody et al., 2008;  
57 Koester et al., 2014) are close to their theoretical maximum in modern soybean genotypes. In  
58 contrast,  $\epsilon_c$  is calculated to be between 2-4 % (Koester et al., 2014), which is less than half the  
59 theoretical maximum (Zhu et al., 2010) making it an attractive target for improvement. Several  
60 strategies have been proposed to increase  $\epsilon_c$  (Zhu et al., 2010; Long et al., 2019) and experiments  
61 in *Nicotiana tabacum* have shown it is possible by genetic modification (Lefebvre et al., 2005;  
62 Kromdijk et al., 2016; South et al., 2019).

63

64 One strategy to improve  $\epsilon_c$  focuses on altering photoprotection (Kromdijk et al., 2016).  
65 Photodamage can occur when the amount of light absorbed exceeds the rate at which it is used for  
66 the fixation of carbon, also known as photochemical quenching. Excess absorbed light energy can  
67 be dissipated by non-photochemical quenching (NPQ), reducing the likelihood that damaging  
68 reactive oxygen species are formed (Murchie and Lawson, 2013; Ruban, 2016). In a field  
69 environment, leaves within a canopy are exposed to instantaneous fluctuations in light caused by

70 intermittent cloud cover and wind induced leaf movements. This requires rapid activation and  
71 deactivation of NPQ to adjust to altering light levels and reduce field recombination-induced  
72 photodamage (FRIP) caused by  $^1\text{O}_2$  production (Davis et al., 2016). However, a delay in relaxing  
73 NPQ during high to low light transitions is predicted to result in unnecessary dissipation of energy,  
74 reducing the efficiency of photosynthesis (Zhu et al., 2004). To address this, Kromdijk et al. (2016)  
75 manipulated the expression of three genes involved in photoprotection, including Zeaxanthin  
76 epoxidase (ZEP), Violaxanthin de-epoxidase (VDE) and Photosystem II subunit S (PsbS),  
77 showing it is possible to speed up the rate of activation and relaxation of NPQ, leading to improved  
78 efficiency of photosynthesis and increased biomass accumulation (Kromdijk et al., 2016).

79  
80 NPQ is a collection of processes, including fast, energy dependent quenching (qE)(Krause et al.,  
81 1982), medium term processes (qM): zeaxanthin dependent quenching (qZ)(Nilkens et al., 2010)  
82 and state transitions (qT)(Quick and Stitt, 1989), and long term quenching: photoinhibition  
83 (qI)(Krause, 1988) and photoinhibition independent quenching (qH)(Malnoë et al., 2018).

84  
85 However, it is unclear what is an ideal amount of photoprotection, measured as the amplitude of  
86 qE and qM, and if it can be optimized, as it is likely to vary between species and environment. Too  
87 much photoprotection will unnecessarily dissipate light energy that could be used for  
88 photosynthesis, while too little will result in photodamage, reducing photosynthetic efficiency.  
89 Therefore the best genotypes will have an empirically determined optimum level of NPQ, relax  
90 photoprotection quickly and experience minimal photodamage, thereby maximizing  
91 photosynthetic efficiency.

92  
93 From a breeding perspective, it is important to assess both the degree of variation available in  
94 germplasm and the extent to which this variation is heritable in order to determine whether a trait  
95 can be improved through breeding. Previous studies on diverse genotypes in rice (Kasajima et al.,  
96 2011; Wang et al., 2017) and arabidopsis (Jung and Niyogi, 2009; Rungrat et al., 2019) have  
97 demonstrated the existence of substantial variation in NPQ within species, but focused only on  
98 maximum NPQ (Wang et al., 2017) or qE (Jung and Niyogi, 2009; Kasajima et al., 2011; Rungrat  
99 et al., 2019) and did not assess heritability.

100

101 Chlorophyll fluorescence was evaluated in two studies with field grown soybean, using canopy  
102 reflectance to calculate photochemical reflectance index (PRI), which is a proxy for NPQ (Herritt  
103 et al., 2016), and OJIP transients to look at variation in fluorescence kinetics (Herritt et al., 2018).  
104 Estimates of the broad sense heritability of traits ( $H^2$ ), ranged from 69 % for PRI and 36.8 % for  
105 dark fluorescence values  $F_0$ , to 0.4 % for energy flux for electron transport per reaction center.  
106 However, the individual components of NPQ relaxation was not assessed by Herritt *et al.* (2016,  
107 2018). Therefore, the extent to which individual components of NPQ co-vary in natural  
108 populations and whether they can be easily selected in breeding programs remains unclear.

109  
110 Here, rates of NPQ relaxation in the 41 parents of the soybean nested association mapping (NAM)  
111 population (Song et al., 2017; Diers et al., 2018) were measured and a double exponential curve  
112 was fit (Dall'Osto et al., 2014) to calculate the amplitude of qE (AqE), qM (AqM), qI (AqI), and  
113 the half-life of qE ( $\tau_{qE}$ ) and qM ( $\tau_{qM}$ ) relaxation. This population includes 18 elite breeding  
114 genotypes, 15 diverse breeding genotypes that contain exotic diversity, and eight exotically  
115 sourced plant introductions. These data were used to test the hypothesis that (1) there is significant  
116 diversity in rates of NPQ relaxation between soybean genotypes and (2) individual components of  
117 NPQ relaxation vary independently between parents. The heritability of NPQ relaxation  
118 components were then calculated to assess the potential for breeding improved solar conversion  
119 efficiency.

## 120 **Methods**

### 121 **Plants and growth conditions**

122 The 41 parents of the Soybean Nested Association Mapping (NAM) population (Song et al., 2017,  
123 Diers et al., 2018) were grown in the field at the Crop Sciences Research and Education Center at  
124 the University of Illinois at Urbana-Champaign in 2018 and 2019. Seeds were planted on 23 May  
125 2018 and 6 June 2019 in 1.2 meter long single-row plots with a 0.75 m row spacing at a rate of 40  
126 seed m<sup>-1</sup>. The experiment was arranged in a randomized complete block design with five replicates  
127 and standard agronomic practices were employed.

128

### 129 **Meteorological data collection**

130 Meteorological variables were measured every 30-minutes by a weather station at the University  
131 of Illinois Energy Farm, approximately 1 km from the Crop Sciences Research and Education  
132 Center (latitude 40.062832, longitude -88.198417). Air temperature (Ta, °C) and relative humidity  
133 (RH, %) were recorded by a HMP45C probe (Campbell Scientific, Logan, UT, USA), and  
134 incoming shortwave radiation (Fsd, W m<sup>-2</sup>) was from a CNR1 radiometer (Kipp & Zonen, The  
135 Netherlands), both instruments were installed 4 m above the ground. Rainfall (mm) was obtained  
136 from the Illinois Water Survey at 30-minute time step (Illinois State Water Survey, 2020). Ta and  
137 RH were used to calculate saturation vapor pressure (e<sub>s</sub>) and actual vapor pressure (e<sub>a</sub>) for each  
138 30-minute period, which were then used to calculate vapor pressure deficit (VPD, kPa) as per  
139 Equations 1-3:

$$140 \quad e_s = 0.6106 * \exp\left(\frac{(17.27*Ta)}{(237.3+Ta)}\right) \quad \text{Equation 1}$$

$$141 \quad e_a = \frac{RH * e_s}{100} \quad \text{Equation 2}$$

$$142 \quad VPD = e_s - e_a \quad \text{Equation 3}$$

143

144 Occasional gaps in meteorological data are inevitable when measuring at these time scales, so data  
145 gaps were filled where needed following (Isaac et al., 2017), whereby an artificial neural network  
146 was used to generate a complete time-series with external data sourced from the University of  
147 Illinois Willard Airport weather station (station ID: 725315-94870) and ERA-interim data from  
148 the European Centre for Medium Range Forecasts (Dee et al., 2011). In total, less than 5 % of data  
149 required gap filling. Daily summary values were then calculated for each variable, with Ta and

150 VPD presented as daily mean, Fsd as daytime-only (i.e. 06:00-18:00) mean, and rainfall as a daily  
151 sum. A 7-day rolling mean was calculated to aid with data visualization.

152

### 153 **Chlorophyll fluorescence analysis**

154 Plants were sampled on the 19th of July 2018 and the 26<sup>th</sup> July 2019, when at the R1-R3  
155 developmental stage. Three 4.8 mm leaf disks were collected from the upper-most mature leaf of  
156 each replicate strip in the field using a cork borer (Humboldt H9663; Fisher Scientific 07-865-  
157 10B).

158

159 In 2018 leaf disks were placed face down in clear 96 well plates and held in position with a moist  
160 sponge cut to the size of a well. Plates were transported back to the laboratory for overnight dark  
161 incubation to allow for relaxation of long term NPQ. In 2019 leaf disks sampled in the field were  
162 floated on dH<sub>2</sub>O in a 24 well plate which was sealed with parafilm for transportation back to the  
163 laboratory for ease of manipulation. Leaf disks were then transferred to a square petri dish lined  
164 with wet filter paper, and plates sealed with parafilm and wrapped in aluminum foil for overnight  
165 incubation.

166

167 Measurements were taken with modulated chlorophyll fluorescence imaging systems, in 2018  
168 using a CF imager (Technologica, UK) and in 2019 a FluorCam FC 800-C (PSI Systems, Czech  
169 Republic in 2019). Briefly, overnight incubated disks were subjected to 10 min illumination at  
170 1000  $\mu\text{mol m}^{-2} \text{s}^{-1}$  white light (6500 K) followed by 50 min of darkness.  $F_m$ , was determined by  
171 applying saturating pulses (4000  $\mu\text{mol m}^{-2} \text{s}^{-1}$  white light) at 9, 40, 60, 80, 100, 120, 160, 200,  
172 240, 300, 360, 420, 480, 540 and 598 s after the actinic light was turned on, and at 1, 2, 4, 6, 8, 10,  
173 14, 18, 22, 26, 32, 38, 44 and 50 min after the actinic light was turned off. The background was  
174 excluded automatically and NPQ values at each pulse were calculated.

175

176 In 2018, NPQ values were calculated for each time point using FluorImager v2.305 with custom  
177 MatLab R0218b scripts (see accession numbers) and in 2019 using the software FluorCam7  
178 v.1.2.5.3. NPQ relaxation parameters AqE, AqM, AqI,  $\tau\text{qE}$  and  $\tau\text{qM}$  were then calculated by fitting  
179 a double exponential function to measured NPQ values following shut off of the actinic light,  
180 according to Equation 4 (Dall'Osto et al., 2014):



181 
$$\phi NPQ = \phi AqI + \phi AqE^{(-\frac{t}{\tau qE})} + \phi AqM^{(-\frac{t}{\tau qM})}$$
 Equation 4

182  
183 using the fit function in MatLab R0218b (see accession numbers), where  $t$  is the measured  
184 fluorescence at a given timepoint. Maximum NPQ values are defined as the maximum value  
185 reached during the 10 min illumination.

186  
187 **Statistical Analysis**

188 After visual inspection of data distributions, outliers were defined and removed if values were  
189 outside 1.5 x the interquartile range (IQR). Statistical significance was determined by one-way  
190 ANOVA with a post-hoc Games-Howell test at an alpha level 0.05 using the R package  
191 ‘userfriendlyscience 0.7.2’ (Peters, 2018) and custom R-scripts (see accession numbers). Pearson  
192 correlations between NPQ relaxation parameters  $AqE$ ,  $AqM$ ,  $AqI$ ,  $\tau qE$  and  $\tau qM$ , and between  
193 years, were determined using the R package ‘PerformanceAnalytics 2.0.4’ (Peterson et al., 2020).

194  
195 **Broad sense heritability calculation**

196 The mean of technical replicates taken from genotypes in each year was used to estimate the  
197 heritability of NPQ relaxation parameters. Variance components were determined using a linear  
198 mixed effects model (lmer) function in the R package ‘lme4 1.1-23’ (Bates et al., 2015), with  
199 genotype as a random effect and environmental variance estimated from the residuals. Broad-sense  
200 heritability was then calculated according to Equation 5:

201  
202 
$$H = \delta_G^2 / (\delta_G^2 + \delta_E^2)$$
 Equation 5

203  
204 Where  $H^2$  is broad sense heritability,  $\delta_G^2$  is genotypic variance and  $\delta_E^2$  is environmental variance.

205  
206 **Accession numbers**

207 Raw chlorophyll fluorescence imager files and scripts are deposited on figshare and can be  
208 accessed at <https://doi.org/10.6084/m9.figshare.c.5075717>.

209 **Supplemental Data Files**

210 Supplemental Data 1: NPQ relaxation parameters calculated for the 41 parents of the Soybean

211 Nested Association Mapping panel

212 Supplemental Data 2: ANOVA and Games-Howell posthoc test results comparing NPQ

213 relaxation kinetics between 41 founder lines of Soybean NAM population

214 Supplemental Figure 1: NPQ relaxation kinetics of the 41 parents of the soybean NAM

215 population in 2018.

216 Supplemental Figure 2: NPQ relaxation kinetics of the 41 parents of the soybean NAM population

217 in 2018.

218 Supplemental Figure 3: Pearson correlation between NPQ parameters of the 41 parents of the

219 soybean NAM population in 2018.

220 Supplemental Figure 4: Pearson correlation between NPQ parameters of the 41 parents of the

221 soybean NAM population in 2019.

222 Supplemental Figure 5: Pearson correlation between measured AqE values of 41 parents of the

223 soybean NAM population in 2018 and 2019.

224 Supplemental Figure 6: Pearson correlation between measured AqM values of 41 parents of the

225 soybean NAM population in 2018 and 2019.

226 Supplemental Figure 7: Pearson correlation between measured AqI values of 41 parents of the

227 soybean NAM population in 2018 and 2019.

228 Supplemental Figure 8: Pearson correlation between measured  $\tau$ qE values of 41 parents of the

229 soybean NAM population in 2018 and 2019.

230 Supplemental Figure 9: Pearson correlation between measured  $\tau$ qM values of 41 parents of the

231 soybean NAM population in 2018 and 2019.

232 Supplemental Figure 10: Pearson correlation between measured maximum NPQ values of 41

233 parents of the soybean NAM population in 2018 and 2019.

## 234 **Results**

235 NPQ relaxation was measured for the 41 parents of the soybean NAM population over two  
236 growing seasons in Urbana, IL, USA (2018 and 2019), to investigate genotypic and environmental  
237 variation. Trends between genotypes were compared between years, rather than measured values,  
238 as different chlorophyll fluorescence imaging systems were used (see methods). In both years, the  
239 amplitude of NPQ attributable to fast, medium and slow relaxing phases was determined to be  $qE$   
240  $> qM > qI$  for all parents (Figure 1 and 2; Supplemental Figure 1 and 2, Supplemental Data 1).

241  
242 Here we describe in detail the results for 2019, which was performed with increased technical  
243 replicates to allow for discarding of outliers facilitating statistical analysis, but population level  
244 trends were similar in 2018 (Supplemental Data 1; Supplemental Figure 1 and 2). In 2019, there  
245 was a statistically significant difference in the amplitude of  $qE$  ( $AqE$ ) between parents ( $F(40,127)$   
246  $= 2.06$ ,  $p=0.0013$ ), which ranged between  $1.57 \pm 0.11$  (NAM64) and  $2.36 \pm 0.28$  (NAM2)(Figure  
247 1). Measured NPQ attributable to  $qI$ ,  $AqI$  ( $F(40,127) = 1.54$ ,  $p=0.037$ ), differed  $\sim 2$  fold between  
248 the smallest ( $0.09 \pm 0.05$ ; NAM33) and largest ( $0.021 \pm 0.03$ ; NAM28) (Figure 1). In terms of  
249 relaxation rates, there was a globally statistically significant difference ( $F(40,127) = 2.51$ ,  
250  $p=<0.001$ ) in measured  $\tau qE$ , which varied  $\sim 1.5$  fold between the fastest ( $28.2 \pm 3.6s$ ; NAM64) and  
251 slowest ( $43.2 \pm 5.4s$ ; NAM38) parent, but non-significant pairwise comparisons by Games-  
252 Howells posthoc test, which may be a result of the relatively low replication. In addition, there was  
253 a  $\sim 2$  fold difference in  $\tau qM$  between the fastest ( $12.7 \pm 2.0$  min; NAM27) and slowest relaxing  
254 ( $25.0 \pm 6.5$  min; RC) parents which was not statistically significant ( $p>0.05$ ) (Figure 2;  
255 Supplemental Data 2) and there was no statistically significance difference between maximum  
256 recorded NPQ values (lowest,  $2.13 \pm 0.41$ , NAM50; highest,  $3.42 \pm 0.43$ )(Figure 2). However,  
257 taken together, these data indicate there is substantial variation in NPQ parameters within soybean  
258 germplasm.

259  
260 Comparing trends from both years, there was a significant positive correlation between maximum  
261 NPQ and  $AqE$  ( $0.75$ ,  $p<0.001$  in 2018;  $0.67$ ,  $p<0.001$  in 2019) (Supplemental Figures 3 and 4).  
262 However, there was no correlation between maximum NPQ and  $AqI$  ( $0.08$ ,  $p>0.05$  in 2018;  $0.26$ ,  
263  $p>0.05$  in 2019)(Supplemental Figures 3 and 4), which would be in accordance with the majority

264 of qI being unrelated to photoprotection, being instead generated by photodamage, given the  
265 assumption NPQ increases in response to a greater requirement to dissipate excess reducing power.

266

267 While measured parameters fell within in a similar range in both 2018 and 2019 (Figure 1 and 2;  
268 Supplemental Figure 1 and 2), parents behaved differently between years, as there was no  
269 correlation between the recorded values in 2018 and 2019 (Supplemental Figures 5-10), which is  
270 consistent with a strong environmental and genotype by environment effect on NPQ. To  
271 investigate this further, we analyzed the variation in climatic conditions over the growing period  
272 in 2018 and 2019 taking data from a weather station on a nearby farm (Figure 3). Fluorescence  
273 measurements were made on day 201 in 2018 and day 207 in 2019.

274

275 On the day of measurement, total solar radiation and mean air temperature were similar across the  
276 two years, at  $\sim 45 \text{ MJ m}^{-2}$  and  $\sim 23 \text{ }^\circ\text{C}$  respectively, while VPD was at  $\sim 0.8$  in 2019 compared to  
277  $\sim 0.7$  (Figure 3). However, cumulative rainfall in 2018 was approximately double that of 2019  
278 reaching 250 mm over June and July, and average air temperature was higher in the early growing  
279 season, increasing from  $22 \text{ }^\circ\text{C}$  to a high of  $26 \text{ }^\circ\text{C}$  over the first 20 days, compared to a decrease in  
280 temperature from  $23 \text{ }^\circ\text{C}$  to  $19 \text{ }^\circ\text{C}$  in 2019 (Figure 3). While there was no clear difference in total  
281 incident solar radiation, which is influenced by cloud cover and fluctuated between 30 and 55 MJ  
282  $\text{m}^{-2}$  in both years (Figure 3), the differences in precipitation and temperature were reflected in  
283 periodically higher vapor pressure deficit (VPD) in 2019, which fluctuated between 1.2 and 0.4  
284 kPa (Figure 3)

285

286 In order to assess the potential for breeding soybean for improved NPQ characteristics we  
287 calculated the heritability of parameters showing significant variation between genotypes  
288 including AqE (0.21) and AqI (0.11) using data from 2019 (Table 1).

## 289 **Discussion**

290 Increasing the rate of NPQ activation and relaxation has been demonstrated as a means to improve  
291 photosynthetic efficiency (Kromdijk et al., 2016), and although further research is required to  
292 understand potential species-specific differences (Garcia-Molina and Leister, 2020) and the  
293 potential effects of reduced ROS production from quicker activation (Davis et al., 2017), targeting  
294 NPQ is proposed as a means for crop improvement (Long et al., 2019). The data collected here  
295 indicate there is a statistically significant difference in NPQ relaxation rates in the parents of the  
296 soybean NAM population, and this study provides the basis for further research to map genomic  
297 loci responsible through screening of the wider population (Song et al., 2017; Diers et al., 2018).

298  
299 Taking the slowest, fastest and average short term relaxation rates of the NAM parents in 2019,  
300 and inputting them into a soybean canopy photosynthesis model suggested the difference between  
301 the slowest and average could result in a small but substantial (1.3 %) increase in carbon  
302 assimilation on a cloudy day (Wang et al., 2020). However, it remained unclear to what extent this  
303 variation in soybean is heritable, information which is required to estimate the ease with which  
304 variation in NPQ could be selected for in a conventional breeding program. We therefore sort to  
305 address this through analysis of the entire NAM population.

306  
307 NPQ is a multigene trait, and is likely to be affected by environmental fluctuations that influence  
308 cellular energy status, including temperature, water availability, nutrient availability and pathogen  
309 attack. Subsequently, we observed a low ( $< 0.5$ ) heritability value for NPQ relaxation parameters  
310 in the NAM population using current screening approaches in a field environment. This is similar  
311 to heritability estimates from OJIP measurements of chlorophyll fluorescence in a larger panel of  
312 soybean genotypes (Herritt et al., 2018), and those reported for other photosynthetic traits such as  
313  $J_{\max}$  in wheat (0.32; (Driever et al., 2014)).

314  
315 In addition, we observed no significant correlation between measured parameters over 2018 and  
316 2019, suggesting a strong environmental effect. Meteorological data indicates conditions on the  
317 day of sampling were similar, but plants may have been more water limited throughout the duration  
318 of the growing season in 2019. Therefore, the environmental cause of variation in NPQ relaxation  
319 parameters between 2018 and 2019 could be related to long term adaptation to annual differences

320 in rainfall and temperature, requiring further investigation. However, heritability is also dependent  
321 on the presence of large effect alleles within a population. While significant genotypic variation in  
322 AqE and AqI was identified in the NAM population, the data also suggest that unlike in some other  
323 species, such as rice (Kasajima et al., 2011), there were no large effect alleles present in the  
324 population screened.

325  
326 Therefore, several approaches could be considered to improve the potential for breeding faster  
327 relaxation of NPQ: screening a bigger collection of diverse soybean genotypes to identify potential  
328 large effect alleles, growing and measuring genotypes under controlled conditions to reduce  
329 environmental variation, increasing replication over multiple environments, and improving  
330 statistical methods to reduce variation. One step towards achieving this goal could be coupling  
331 large scale screening with open availability of data as reported elsewhere (Kuhlgert et al., 2016).

332  
333 Genetic modification provides an alternative means of modulating NPQ (Armbruster et al., 2016;  
334 Kromdijk et al., 2016), and to be successful this will depend on both an understanding of the genes  
335 regulating NPQ relaxation, and how they influence plant energetics in a fluctuating environment  
336 (Kramer and Evans, 2011). While several of the genes involved in fast and medium term relaxation  
337 of NPQ have been identified, further work is required to understand which are the key genes and  
338 processes underlying long term NPQ relaxation, or qI. Advances in what in addition to new  
339 forward genetic screens, such as those that identified the novel slow relaxing phase qH (Malnoë et  
340 al., 2018), and refinement of candidate gene lists identified by genome wide association analysis  
341 (Rungrat et al., 2019) is required.

342  
343 In conclusion, we measured NPQ relaxation in the 41 parents of the soybean NAM population;  
344 while there is significant genotypic variation, there was a strong environmental effect resulting in  
345 low heritability estimates which imply selection by breeding will be difficult. Therefore given  
346 current approaches and information, the most effective means of manipulating NPQ for improved  
347 photosynthetic performance in soybean will likely rely on genetic modification.

348 **Acknowledgements**

349 We thank Troy Cary for setting up the soybean NAM population plots, Wanne Kromdijk for help  
350 setting up scripts for analysis of NPQ relaxation parameters and Liana Acevedo-Siaca for support  
351 with statistics. This work was supported by the project Realizing Increased Photosynthetic  
352 Efficiency (RIPE), funded by the Bill and Melinda Gates Foundation (BMGF), Foundation for  
353 Food and Agriculture Research (FFAR) and the UK Department for International Development  
354 (UKAid) under grant number OPP117215. SJB was supported by Carl R. Woese Institute for  
355 Genomic Biology Fellowship and EMDB is supported by an Illinois Distinguished Fellowship.

356

357 **Author contributions**

358 SPL, SJB and BWD designed the study. SJB, EMBD, IC, IF and SC conducted the NPQ  
359 measurements, CM conducted the meteorological data collection. SJB and CM performed the data  
360 analysis. SJB, SPL, EMDB, CM and BWD wrote the article and all authors provided critical  
361 revisions.

362

363 **Conflict of Interest**

364 The authors report no conflicts of interest

365 **Figure Legends**

366

367 **Table 1: Estimates of heritability of NPQ relaxation kinetics AqE, AqI, and  $\tau$ qE based on**  
368 **field data.** Data are shown for 2019, including the genotypic ( $\delta^2_G$ ) and environmental ( $\delta^2_E$ )  
369 variance and the derived broad sense heritability value ( $H^2$ ) for AqE and AqI. Heritability values  
370 are represented to two significant figures.

371

372 **Figure 1: NPQ relaxation kinetics of the 41 parents of the soybean NAM population in 2019.**  
373 Box plots representing (a) AqE, (b) AqM, (c) AqI, displaying mean and standard deviation. Data  
374 points for the mean of n=3-5 (See Supplemental Data 1 for details) biological replicates are  
375 displayed. Colors correspond to genotype groups, including: Reference genotype (grey), EL = elite  
376 genotype (orange), BX = breeding genotype with exotic ancestry (blue), PI = plant introductions  
377 (magenta). Letters denote significant groupings ( $\alpha=0.05$ ) based on Games-Howell posthoc test.

378

379 **Figure 2: NPQ relaxation kinetics of the 41 parents of the soybean NAM population in**  
380 **2019.** Box plots representing (a)  $\tau$ qE, (b)  $\tau$ qM, (c) maximum NPQ, displaying mean and  
381 standard deviation. Data points for the mean of n=3-5 (See Supplemental Data 1 for details)  
382 biological replicates are displayed. Colors correspond to genotype groups, including: Reference  
383 genotype (grey), EL = elite genotype (orange), BX = breeding genotype with exotic ancestry  
384 (blue), PI = plant introductions (magenta).

385

386 **Figure 3: Climate data for June and July in Champaign-Urbana, Illinois comparing 2018**  
387 **and 2019.** Line graphs show cumulative rainfall (mm), air temperature ( $^{\circ}\text{C}$ ), solar radiation ( $\text{MJ}$   
388  $\text{m}^{-2}$ ) and VPD (kPa) for 2018 (purple), 2019 (green). Data are presented as 7-day running mean  
389 with +/- a 7-day running error shading.



390

| <b>Parameter</b> | <b><math>\delta^2_G</math></b> | <b><math>\delta^2_E</math></b> | <b><math>H^2</math></b> |
|------------------|--------------------------------|--------------------------------|-------------------------|
| AqE              | 1.81E-02                       | 6.94E-02                       | 0.21                    |
| AqI              | 3.33E-04                       | 2.66E-03                       | 0.11                    |

391 **Table 1**

## 392 References

- 393 Armbruster U, Leonelli L, Correa Galvis V, Strand D, Quinn EH, Jonikas MC, Niyogi KK  
394 (2016) Regulation and Levels of the Thylakoid K<sup>+</sup>/H<sup>+</sup> Antiporter KEA3 Shape the  
395 Dynamic Response of Photosynthesis in Fluctuating Light. *Plant Cell Physiol* 57: 1557–  
396 1567
- 397 Bates D, Mächler M, Bolker B, Walker S (2015) Fitting Linear Mixed-Effects Models Using  
398 lme4. *J Stat Softw Artic* 67: 1–48
- 399 Dall'Osto L, Cazzaniga S, Wada M, Bassi R (2014) On the origin of a slowly reversible  
400 fluorescence decay component in the *Arabidopsis* npq4 mutant. *Philos Trans R Soc Lond*  
401 *B Biol Sci* 369: 20130221–20130221
- 402 Davis GA, Kanazawa A, Schöttler MA, Kohzuma K, Froehlich JE, Rutherford AW, Satoh-Cruz  
403 M, Minhas D, Tietz S, Dhingra A, et al (2016) Limitations to photosynthesis by proton  
404 motive force-induced photosystem II photodamage. *eLife* 5: e16921
- 405 Davis GA, Rutherford AW, Kramer DM (2017) Hacking the thylakoid proton motive force for  
406 improved photosynthesis: modulating ion flux rates that control proton motive force  
407 partitioning into  $\Delta\psi$  and  $\Delta pH$ . *Phil Trans R Soc B* 372: 20160381
- 408 Dee DP, Uppala SM, Simmons AJ, Berrisford P, Poli P, Kobayashi S, Andrae U, Balmaseda  
409 MA, Balsamo G, Bauer P, et al (2011) The ERA-Interim reanalysis: configuration and  
410 performance of the data assimilation system. *Q J R Meteorol Soc* 137: 553–597
- 411 Dermody O, Long SP, McConnaughay K, DeLucia EH (2008) How do elevated CO<sub>2</sub> and O<sub>3</sub>  
412 affect the interception and utilization of radiation by a soybean canopy? *Glob Change*  
413 *Biol* 14: 556–564
- 414 Diers BW, Specht J, Rainey KM, Cregan P, Song Q, Ramasubramanian V, Graef G, Nelson R,  
415 Schapaugh W, Wang D, et al (2018) Genetic Architecture of Soybean Yield and  
416 Agronomic Traits. *G3 GenesGenomesGenetics* 8: 3367
- 417 Driever SM, Lawson T, Andralojc PJ, Raines CA, Parry MAJ (2014) Natural variation in  
418 photosynthetic capacity, growth, and yield in 64 field-grown wheat genotypes. *J Exp Bot*  
419 65: 4959–4973
- 420 Garcia-Molina A, Leister D (2020) Accelerated relaxation of photoprotection impairs biomass  
421 accumulation in *Arabidopsis*. *Nat Plants* 6: 9–12
- 422 Grassini P, Eskridge KM, Cassman KG (2013) Distinguishing between yield advances and yield  
423 plateaus in historical crop production trends. *Nat Commun* 4: 2918
- 424 Herritt M, Dhanapal AP, Fritschi FB (2016) Identification of Genomic Loci Associated with the  
425 Photochemical Reflectance Index by Genome-Wide Association Study in Soybean. *Plant*  
426 *Genome*. doi: 10.3835/plantgenome2015.08.0072

- 427 Herritt M, Dhanapal AP, Purcell LC, Fritschi FB (2018) Identification of genomic loci associated  
428 with 21 chlorophyll fluorescence phenotypes by genome-wide association analysis in  
429 soybean. *BMC Plant Biol* 18: 312
- 430 Illinois State Water Survey (2020) Water and Atmospheric Resources Program. Illinois Climate  
431 Network. 2204 Griffith Drive, Champaign, IL 61820-7495. 2204 Griffith Drive  
432 Champaign IL 61820-7495. doi: 10.13012/J8MW2F2Q
- 433 Isaac P, Cleverly J, McHugh I, van Gorsel E, Ewenz C, Beringer J (2017) OzFlux Data: Network  
434 integration from collection to curation. *Biogeosciences* 14: 1–41
- 435 Jung H-S, Niyogi KK (2009) Quantitative Genetic Analysis of Thermal Dissipation in  
436 *Arabidopsis*. *Plant Physiol* 150: 977
- 437 Kasajima I, Ebana K, Yamamoto T, Takahara K, Yano M, Kawai-Yamada M, Uchimiya H  
438 (2011) Molecular distinction in genetic regulation of nonphotochemical quenching in  
439 rice. *Proc Natl Acad Sci* 108: 13835
- 440 Koester RP, Nohl BM, Diers BW, Ainsworth EA (2016) Has photosynthetic capacity increased  
441 with 80 years of soybean breeding? An examination of historical soybean cultivars. *Plant*  
442 *Cell Environ* 39: 1058–1067
- 443 Koester RP, Skoneczka JA, Cary TR, Diers BW, Ainsworth EA (2014) Historical gains in  
444 soybean (*Glycine max* Merr.) seed yield are driven by linear increases in light  
445 interception, energy conversion, and partitioning efficiencies. *J Exp Bot* 65: 3311–3321
- 446 Kramer DM, Evans JR (2011) The importance of energy balance in improving photosynthetic  
447 productivity. *Plant Physiol* 155: 70–78
- 448 Krause GH (1988) Photoinhibition of photosynthesis. An evaluation of damaging and protective  
449 mechanisms. *Physiol Plant* 74: 566–574
- 450 Krause GH, Vernotte C, Briantais J-M (1982) Photoinduced quenching of chlorophyll  
451 fluorescence in intact chloroplasts and algae. Resolution into two components. *Biochim*  
452 *Biophys Acta BBA - Bioenerg* 679: 116–124
- 453 Kromdijk J, Głowacka K, Leonelli L, Gabilly ST, Iwai M, Niyogi KK, Long SP (2016)  
454 Improving photosynthesis and crop productivity by accelerating recovery from  
455 photoprotection. *Science* 354: 857–861
- 456 Kuhlert S, Austic G, Zegarac R, Osei-Bonsu I, Hoh D, Chilvers MI, Roth MG, Bi K, TerAvest  
457 D, Weebadde P, et al (2016) MultispeQ Beta: a tool for large-scale plant phenotyping  
458 connected to the open PhotosynQ network. *R Soc Open Sci* 3: 160592
- 459 Lefebvre S, Lawson T, Zakhleniuk OV, Lloyd JC, Raines CA, Fryer M (2005) Increased  
460 sedoheptulose-1,7-bisphosphatase activity in transgenic tobacco plants stimulates  
461 photosynthesis and growth from an early stage in development. *Plant Physiol* 138: 451–  
462 460

- 463 Long SP, Burgess SJ, Causon, I (2019) Chapter 13: Redesigning Crop Photosynthesis, In: . (ed.  
464 R.S. Zeigler) ., Sustain. Glob. Food Secur. – Nexus Sci. Policy. CSIRO Publishing,  
465 Clayton, Victoria, pp 224–246
- 466 Malnoë A, Schultink A, Shahrasbi S, Rumeau D, Havaux M, Niyogi KK (2018) The Plastid  
467 Lipocalin LCNP Is Required for Sustained Photoprotective Energy Dissipation in  
468 Arabidopsis. *Plant Cell* 30: 196
- 469 Morrison MJ, Voldeng HD, Cober ER (1999) Physiological Changes from 58 Years of Genetic  
470 Improvement of Short-Season Soybean Cultivars in Canada ECORC contribution no.  
471 971204. *Agron J* 91: 685–689
- 472 Murchie EH, Lawson T (2013) Chlorophyll fluorescence analysis: a guide to good practice and  
473 understanding some new applications. *J Exp Bot* 64: 3983–3998
- 474 Nilkens M, Kress E, Lambrev P, Miloslavina Y, Müller M, Holzwarth AR, Jahns P (2010)  
475 Identification of a slowly inducible zeaxanthin-dependent component of non-  
476 photochemical quenching of chlorophyll fluorescence generated under steady-state  
477 conditions in Arabidopsis. *Biochim Biophys Acta BBA - Bioenerg* 1797: 466–475
- 478 Peters G-JY (2018) userfriendlyscience: Quantitative analysis made accessible. doi:  
479 10.17605/osf.io/txequ
- 480 Peterson BG, Carl P, Boudt, K, Bennett R, Ulrich J, Zivot E, Comily D, Hung E, Lestel M,  
481 Balkissoon K, et al (2020) Performance Analytics 2.0.4.
- 482 Quick WP, Stitt M (1989) An examination of factors contributing to non-photochemical  
483 quenching of chlorophyll fluorescence in barley leaves. *Biochim Biophys Acta BBA -*  
484 *Bioenerg* 977: 287–296
- 485 Ruban AV (2016) Nonphotochemical Chlorophyll Fluorescence Quenching: Mechanism and  
486 Effectiveness in Protecting Plants from Photodamage. *Plant Physiol* 170: 1903–1916
- 487 Rungrat T, Almonte AA, Cheng R, Gollan PJ, Stuart T, Aro E-M, Borevitz JO, Pogson B,  
488 Wilson PB (2019) A Genome-Wide Association Study of Non-Photochemical Quenching  
489 in response to local seasonal climates in Arabidopsis thaliana. *Plant Direct* 3: e00138–  
490 e00138
- 491 Song Q, Yan L, Quigley C, Jordan BD, Fickus E, Schroeder S, Song B-H, Charles An Y-Q,  
492 Hyten D, Nelson R, et al (2017) Genetic Characterization of the Soybean Nested  
493 Association Mapping Population. *Plant Genome*. doi: 10.3835/plantgenome2016.10.0109
- 494 South PF, Cavanagh AP, Liu HW, Ort DR (2019) Synthetic glycolate metabolism pathways  
495 stimulate crop growth and productivity in the field. *Science* 363: eaat9077
- 496 Specht JE, Diers BW, Nelson RL, Francisco J, de Toledo F, Torrion JA, Grassini P (2014)  
497 Soybean. Yield Gains Major US Field Crops. American Society of Agronomy, Inc., Crop

- 498 Science Society of America, Inc., and Soil Science Society of America, Inc., Madison,  
499 WI, pp 311–356
- 500 Wang Q, Zhao H, Jiang J, Xu J, Xie W, Fu X, Liu C, He Y, Wang G (2017) Genetic Architecture  
501 of Natural Variation in Rice Nonphotochemical Quenching Capacity Revealed by  
502 Genome-Wide Association Study. *Front Plant Sci* 8: 1773–1773
- 503 Wang Y, Burgess SJ, de Becker E, Long SP (2020) Photosynthesis in the fleeting shadows: An  
504 overlooked opportunity for increasing crop productivity? *Plant J* 874–884
- 505 Zhu X, Ort DR, Whitmarsh J, Long SP (2004) The slow reversibility of photosystem II thermal  
506 energy dissipation on transfer from high to low light may cause large losses in carbon  
507 gain by crop canopies: a theoretical analysis. *J Exp Bot* 55: 1167–1175
- 508 Zhu X-G, Long SP, Ort DR (2010) Improving Photosynthetic Efficiency for Greater Yield. *Annu*  
509 *Rev Plant Biol* 61: 235–261
- 510





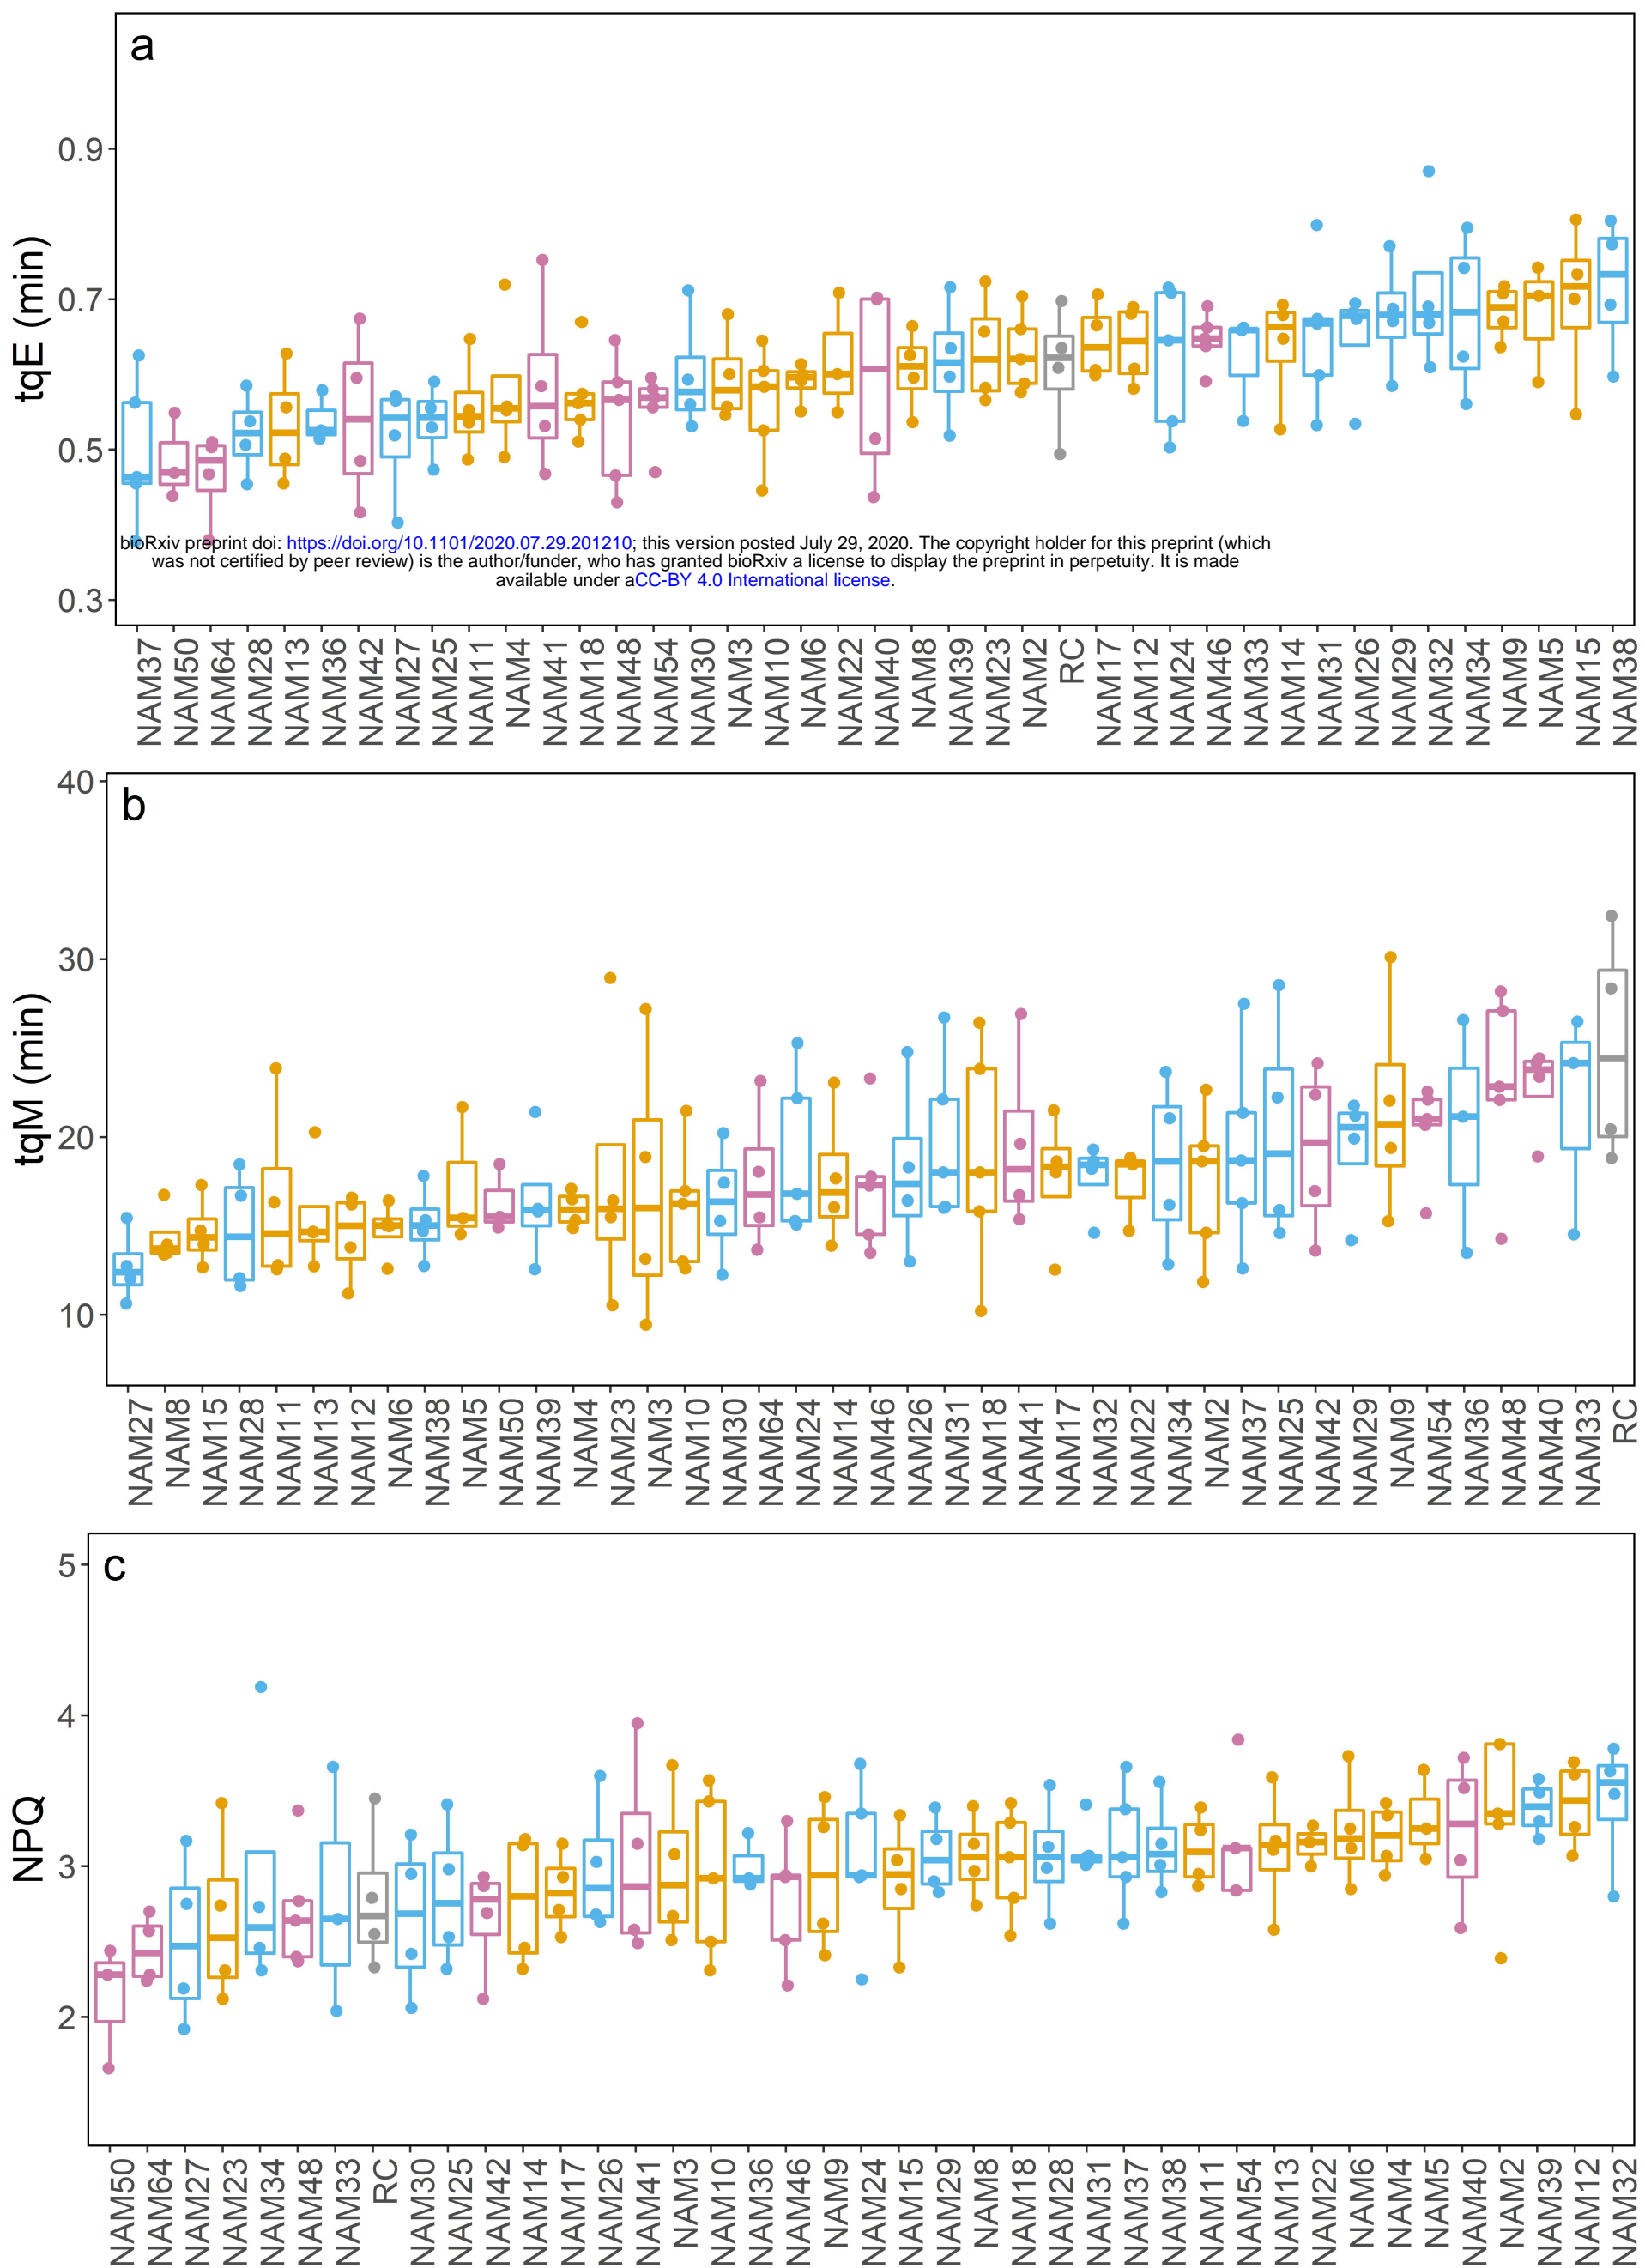

Figure 2

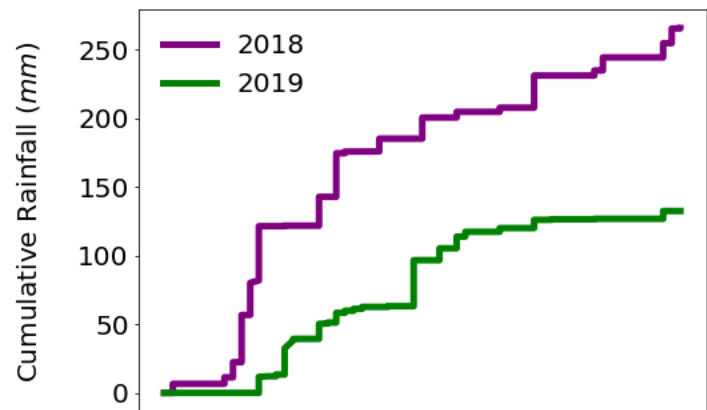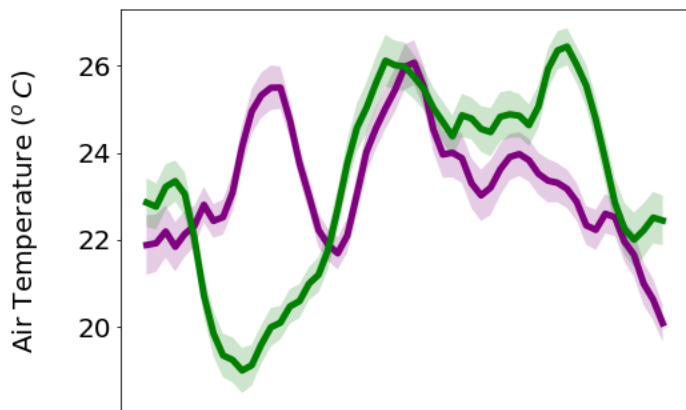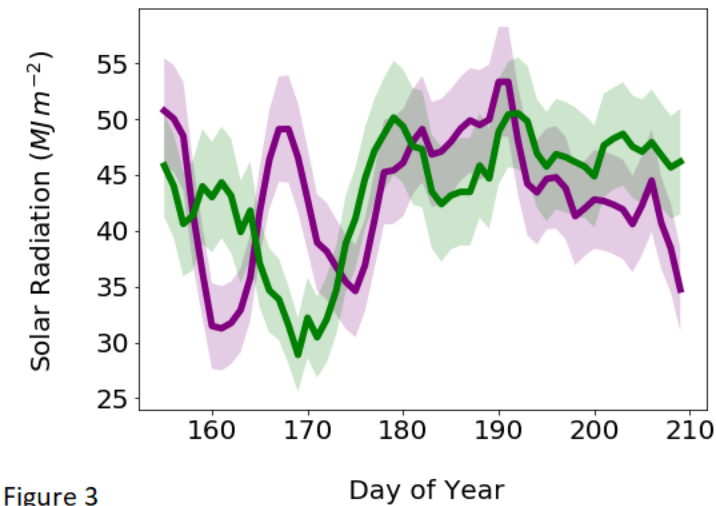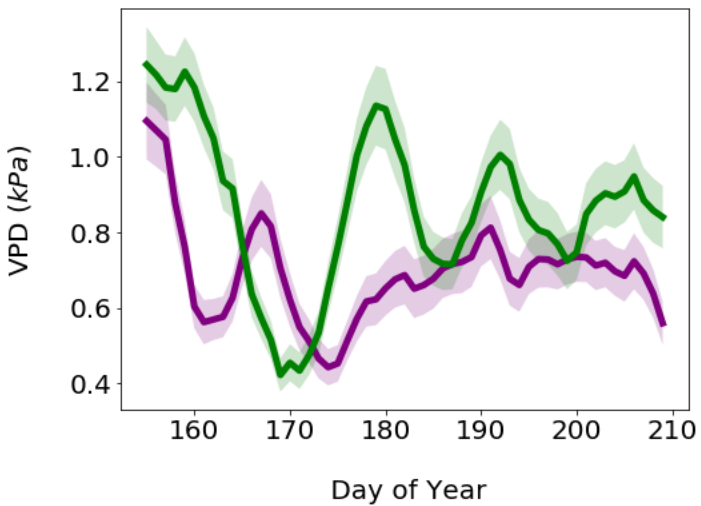

Figure 3
